# Supplementary material
Source: HighWire-hosted journal article supplement (doi:10.1101/rna.080215.124)
Supplement: Supplemental_data.xlsx [file Supplemental_data.xlsx]

## Sheet: Metadata
# This is a metadata template for submission of high-throughput sequencing samples to the GEO database.
# Before filling out the template, we highly recommend reviewing the appropriate EXAMPLE template(s) found on tabs of this Excel file.
# Fields with a red triangle in the upper-right corner have pop-up instructions that can be displayed if you hover over the field.
# Invalid duplicate entries will be auto-highlighted. Please correct. For example, library name, title, raw file entries must be unique.
STUDY
# This section describes the overall study.
# Information provided in this section will be displayed in a GEO Series (GSE record) on public web pages.
*title	Evaluation of novel computational methods that identify RNA-binding protein footprints from structural data
*summary (abstract)	RNA binding proteins (RBP) play diverse roles in mRNA processing and function. However, from over 1,000 RBPs encoded in the human genome, a detailed molecular understanding of their interactions with RNA is available only for a small fraction. In most cases, our knowledge of the combination of RNA sequence and structure required for specific binding is insufficient for enabling exhaustive predict…
*experimental design	eCLIP for four RBPs in five cell types was conducted in replicates for each condition.
contributor
contributor
contributor
contributor
supplementary file
SAMPLES
# Information provided in this section will be displayed in GEO Samples (GSM records) on public web pages.
# A GEO Sample record will be created from each row in this section.
# Biological replicates of the same sample: If provided, should be listed on different rows and titled accordingly (biol rep 1, biol rep 2, and so on).
# Technical replicates, eg, the same libraries were run in different lanes of a flow cell or sequenced multiple times: If provided, list all raw files in the same row, adding more "raw file" columns as needed to accommodate all raw files.
# All library names, titles and raw files must be unique.
*library name	*title	*organism	**tissue	**cell line	**cell type	genotype	treatment	*molecule	*single or paired-end	*instrument model	description	*processed data file	processed data file	*raw file	raw file	raw file	raw file
hnRNPA2B1_HepG2_IN1	hnRNPA2B1_HepG2_Input_rep1	Homo Sapiens		HepG2	Epithelial-like cells			total RNA	single	Illumina NovaSeq 6000		hnRNPA2B1_HepG2.tsv		hnRNPA2B1_HepG2_IN1.fastq.gz
hnRNPA2B1_HepG2_IN2	hnRNPA2B1_HepG2_Input_rep2	Homo Sapiens		HepG2	Epithelial-like cells			total RNA	single	Illumina NovaSeq 6000		hnRNPA2B1_HepG2.tsv		hnRNPA2B1_HepG2_IN2.fastq.gz
hnRNPA2B1_HepG2_IP1	hnRNPA2B1_HepG2_IP_rep1	Homo Sapiens		HepG2	Epithelial-like cells			total RNA	single	Illumina NovaSeq 6000		hnRNPA2B1_HepG2.tsv		hnRNPA2B1_HepG2_IP1.fastq.gz
hnRNPA2B1_HepG2_IP2	hnRNPA2B1_HepG2_IP_rep2	Homo Sapiens		HepG2	Epithelial-like cells			total RNA	single	Illumina NovaSeq 6000		hnRNPA2B1_HepG2.tsv		hnRNPA2B1_HepG2_IP2.fastq.gz
hnRNPC_K562_In1	hnRNPC_K562_Input_rep1	Homo Sapiens		K562	lymphoblast			total RNA	single	Illumina NovaSeq 6000		hnRNPC_K562.tsv		hnRNPC_K562_In1.fastq.gz
hnRNPC_K562_In2	hnRNPC_K562_Input_rep2	Homo Sapiens		K562	lymphoblast			total RNA	single	Illumina NovaSeq 6000		hnRNPC_K562.tsv		hnRNPC_K562_In2.fastq.gz
hnRNPC_K562_IP1	hnRNPC_K562_IP_rep1	Homo Sapiens		K562	lymphoblast			total RNA	single	Illumina NovaSeq 6000		hnRNPC_K562.tsv		hnRNPC_K562_IP1.fastq.gz
hnRNPC_K562_IP2	hnRNPC_K562_IP_rep2	Homo Sapiens		K562	lymphoblast			total RNA	single	Illumina NovaSeq 6000		hnRNPC_K562.tsv		hnRNPC_K562_IP2.fastq.gz
PRPF17_Hek293T_In1	PRPF17_Hek293T_Input_rep1	Homo Sapiens		HEK293T	human embryonic kidney			total RNA	single	Illumina NovaSeq 6000		PRPF17_Hek293T.tsv		PRPF17_Hek293T_In1.fastq.gz
PRPF17_Hek293T_In2	PRPF17_Hek293T_Input_rep2	Homo Sapiens		HEK293T	human embryonic kidney			total RNA	single	Illumina NovaSeq 6000		PRPF17_Hek293T.tsv		PRPF17_Hek293T_In2.fastq.gz
PRPF17_Hek293T_IP1	PRPF17_Hek293T_IP_rep1	Homo Sapiens		HEK293T	human embryonic kidney			total RNA	single	Illumina NovaSeq 6000		PRPF17_Hek293T.tsv		PRPF17_Hek293T_IP1.fastq.gz
PRPF17_Hek293T_IP2	PRPF17_Hek293T_IP_rep2	Homo Sapiens		HEK293T	human embryonic kidney			total RNA	single	Illumina NovaSeq 6000		PRPF17_Hek293T.tsv		PRPF17_Hek293T_IP2.fastq.gz
PRPF17_HeLa_In1	PRPF17_HeLa_Input_rep1	Homo Sapiens		HeLa	epithelial cell			total RNA	single	Illumina NovaSeq 6000		PRPF17_HeLa.tsv		PRPF17_HeLa_In1.fastq.gz
PRPF17_HeLa_In2	PRPF17_HeLa_Input_rep2	Homo Sapiens		HeLa	epithelial cell			total RNA	single	Illumina NovaSeq 6000		PRPF17_HeLa.tsv		PRPF17_HeLa_In2.fastq.gz
PRPF17_HeLa_IP1	PRPF17_HeLa_IP_rep1	Homo Sapiens		HeLa	epithelial cell			total RNA	single	Illumina NovaSeq 6000		PRPF17_HeLa.tsv		PRPF17_HeLa_IP1.fastq.gz
PRPF17_HeLa_IP2	PRPF17_HeLa_IP_rep2	Homo Sapiens		HeLa	epithelial cell			total RNA	single	Illumina NovaSeq 6000		PRPF17_HeLa.tsv		PRPF17_HeLa_IP2.fastq.gz
SND1_k562_IN1	SND1_k562_Input_rep1	Homo Sapiens		K562	lymphoblast			total RNA	single	Illumina NovaSeq 6000		SND1_K562.tsv		SND1_k562_IN1.fastq.gz
SND1_k562_IN2	SND1_k562_Input_rep2	Homo Sapiens		K562	lymphoblast			total RNA	single	Illumina NovaSeq 6000		SND1_K562.tsv		SND1_k562_IN2.fastq.gz
SND1_k562_IP1	SND1_k562_IP_rep1	Homo Sapiens		K562	lymphoblast			total RNA	single	Illumina NovaSeq 6000		SND1_K562.tsv		SND1_k562_IP1.fastq.gz
SND1_k562_IP2	SND1_k562_IP_rep2	Homo Sapiens		K562	lymphoblast			total RNA	single	Illumina NovaSeq 6000		SND1_K562.tsv		SND1_k562_IP2.fastq.gz
PROTOCOLS
# Information provided in this section will appear in each GEO Sample (GSM record).
growth protocol	HEK293T, HepG2 and HeLa cells were cultured in DMEM with 10% FBS at 37C, while K562 were cultured in RPMI1640 with 10% FBS at 37C.
treatment protocol	cells in 10cm plates were washed once with PBS followed by crosslinking with UV (254 nm, 400 mJ/cm2)
*extract protocol	cells were lysed with eCLIP buffer (50 mM Tris-HCl pH 7.4, 100 mM NaCl, 1% NP-40, 0.1% SDS, 0.5% sodium deoxycholate), and RNA was fragmented using RNAse I. Then, samples were subjected for overnight incubation at 4C with corresponding beads-conjugated antibodies.
*library construction protocol	RNA fragments 3' end were dephosphorylated with FastAP (Thermo) and PNK (NEB), followed by 3' barcoded linker ligation (T4 RNA ligase I, NEB). Then, samples were ran on protein gel for an hour on 150V, followed by overnight transfer on nitrocellulose membrane. protein kDa size and 75kDa above it were extracted for IP and size-matched input and extracted from membrane with proteinase K. the sample…
*library strategy	RNA-seq
*data processing step	data processing was done using the Skipper pipeline, freelly available at https://github.com/yeolab/skipper.
data processing step	Adapters trimming was done with Skewer
data processing step	proccessed reads were mapped with STAR (2.7.10a_alpha_220314)
data processing step	PCR bias was removed using UMIcollapse
data processing step
*genome build/assembly	hg38
*processed data files format and content	tab separated values files
processed data files format and content	Supplementary files - reproducible enriched window including p and q values, enrichment scores, and the annotated regions for the significantly bound transcriptome tiled windows.
PAIRED-END EXPERIMENTS
# If "paired-end" experiments are included, list the files for each paired-end run in a row. Each row will become one sequencing run on a GEO Sample (GSM record).
# Single-cell data: If applicable, list index files (I1, I2, etc.) in "file name 3", "file name 4" columns.
# Please make sure all raw files listed here are also listed in the "raw file" columns in the above SAMPLES section.
file name 1	file name 2

## Sheet: Instructions
This file contains the following worksheets: Instructions for high-throughput sequence (HTS) submissions to NCBI GEO Metadata template (Use this tab to provide study, sample and protocol information. Please completely annotate the template. Failure to do so may result in significant delays in processing.) MD5 Checksums for the raw data files and processed data files referenced in Metadata Templat…
This file was last updated by GEO on December 11, 2023.
Full online instructions and pointers to more examples are at: https://www.ncbi.nlm.nih.gov/geo/info/seq.html
For questions or concerns, please email us at geo@ncbi.nlm.nih.gov
Quick Instructions	Links
Step 1: Check that GEO accepts your data type.	Categories of data we do and do not accept
Step 2: Gather raw data files.	Raw data file instructions
Step 3: Gather processed data files.	Processed data file instructions
Step 4: Fill in Metadata tab (one seq type per template). Please review "Before completing your Metadata file" below.	First tab, at the foot of this page
Step 5: Fill in MD5 Checksums sheet for any raw data files and processed data files referenced in Metadata tab.
Step 6: Create a single folder on your computer that contains all raw and processed data files for your experiment. If you have multiple experiments (e.g., ChIP-seq, RNA-seq), please use one folder per experiment.	Create folder
Step 7: FTP the data folder(s) to GEO.	FTP instructions
Step 8: Upload your metadata file(s) on the Submit Metadata page after the FTP transfer is complete; Submissions will not get processed without an uploaded metadata file.	Submit Metadata
Step 9: Your submission is placed into the processing queue and reviewed within 5 business days; expect to receive an email from GEO curators with questions about your submission or the GEO accession numbers.	When will my data receive GEO accession numbers?
* Updating GEO records (that have been processed and approved) can be labor-intensive and time-consuming, so please carefully prepare your submission before you transfer your files to the GEO FTP server. If you must update your GEO records please see our instructions for updates available with the link at right.	Updating your GEO records
Common FAQs (for more FAQs, see https://www.ncbi.nlm.nih.gov/geo/info/seq.html#faq)
Human data warning DO NOT SUBMIT TO GEO if there are patient privacy concerns regarding making data fully public. Rather, submit to NCBI's dbGaP (https://www.ncbi.nlm.nih.gov/gap/) database which has controlled access mechanisms and is an appropriate resource for hosting sensitive patient data. It is the submitter's responsibility to ensure that the submitted information does not compromise parti…
Multi-part studies (SuperSeries) If you have a multi-part study (eg, RNA-seq and ChIP-seq data that are part of the same manuscript), please prepare each part as a separate submission in its own folder (with raw files and processed files). Use a separate metadata file per experiment type. Each part will be assigned a Series accession number. When you upload the metadata file on the Submit Metadat…
Raw data already submitted to SRA It is not necessary for you to submit raw data directly to SRA, but if you did and you want corresponding GEO entries, please use the metadata template specific for this case: https://www.ncbi.nlm.nih.gov/geo/info/examples/seq_template_with_sra_accessions.xlsx NOTE: Do not upload the raw files to GEO and do not list the raw file names in the Metadata template.

## Sheet: MD5 Checksums
# We strongly recommend that submitters provide MD5 checksums for their raw data files. The checksums are used to verify file integrity. Checksums can be calculated using the following methods:
# Unix: md5sum <file>
# OS X: md5 <file>
# Windows: Windows Command Processor (cmd): certutil -hashfile <file> MD5
RAW FILES					PROCESSED DATA FILES
file name	file checksum				file name	file checksum

## Sheet: RNA-seq EXAMPLE
# This EXAMPLE worksheet is for illustrative purposes only and is not editable. Please complete the “Metadata Template" for your submission.
STUDY
# This section describes the overall study.
# Information provided in this section will be displayed in a GEO Series (GSE record) on public web pages.
*title	Effect of depletion of KDM4D, NFIB, and MLL1 on gene expression during adipogenic differentiation of C3H10T1/2 mesenchymal stem cells
*summary (abstract)	The coordinated and sequential actions of lineage-specific transcription factors and epigenetic regulators are essential for the initiation and maintenance of cellular differentiation. We here report KDM4D histone demethylase as a key regulator of adipogenesis in C3H10T1/2 mesenchymal stem cells. The depletion of KDM4D results in impaired differentiation, which can be rescued by exogenous KDM4D, …
*experimental design	To investigate the cooperative function KDM4D/NFIB/MLL1 complex in the regulation of adipogenic differentiation, we established 10T1/2 cell lines in which each target gene has been knocked down by shRNA.
experimental design	We then performed gene expression profiling analysis using data obtained from RNA-seq of 4 different cells at two time points.
experimental design	Comparative gene expression profiling analysis of RNA-seq data for C3H10T1/2 cells and its KD derivatives (shKDM4D, shNFIB, and shMLL1).
contributor	Hansol,Lee
contributor	Janghyun,Choi
supplementary file optional	raw_counts.txt
SAMPLES
# Information provided in this section will be displayed in GEO Samples (GSM records) on public web pages.
# A GEO Sample record will be created from each row in this section.
# Biological replicates of the same sample: If provided, should be listed on different rows and titled accordingly (biol rep 1, biol rep 2, and so on).
# Technical replicates, eg, the same libraries were run in different lanes of a flow cell or sequenced multiple times: If provided, list all raw files in the same row, adding more "raw file" columns as needed to accommodate all raw files.
*library name	*title	*organism	**cell line	**cell type	genotype	treatment	time	*molecule	*single or paired-end	*instrument model	description	*processed data file	processed data file	*raw file	raw file	raw file	raw file
Sample 1	C3H10T1/2 cells, shControl, Day0	Mus musculus	C3H 10T1/2	mesenchymal stem cells	WT	adipogenic differentiation	Day 0	total RNA	paired-end	Illumina HiSeq 2500		raw_counts.txt	shControl_D0.txt	shControl_D0_1.fastq.gz	shControl_D0_2.fastq.gz
Sample 2	C3H10T1/2 cells, shControl, Day5	Mus musculus	C3H 10T1/2	mesenchymal stem cells	WT	adipogenic differentiation	Day 5	total RNA	paired-end	Illumina HiSeq 2500		raw_counts.txt	shControl_D5.txt	shControl_D5_1.fastq.gz	shControl_D5_2.fastq.gz
Sample 3	C3H10T1/2 cells, shKDM4D, Day0	Mus musculus	C3H 10T1/2	mesenchymal stem cells	KDM4D knockdown	adipogenic differentiation	Day 0	total RNA	paired-end	Illumina HiSeq 2500		raw_counts.txt	shKDM4D_D0.txt	shKDM4D_D0_1.fastq.gz	shKDM4D_D0_2.fastq.gz
Sample 4	C3H10T1/2 cells, shKDM4D, Day5	Mus musculus	C3H 10T1/2	mesenchymal stem cells	KDM4D knockdown	adipogenic differentiation	Day 5	total RNA	paired-end	Illumina HiSeq 2500		raw_counts.txt	shKDM4D_D5.txt	shKDM4D_D5_1.fastq.gz	shKDM4D_D5_2.fastq.gz
Sample 5	C3H10T1/2 cells, shNFIB, Day0	Mus musculus	C3H 10T1/2	mesenchymal stem cells	NFIB knockdown	adipogenic differentiation	Day 0	total RNA	paired-end	Illumina HiSeq 2500		raw_counts.txt	shNFIb_D0.txt	shNF1b_D0_1.fastq.gz	shNF1b_D0_2.fastq.gz
Sample 6	C3H10T1/2 cells, shNFIB, Day5	Mus musculus	C3H 10T1/2	mesenchymal stem cells	NFIB knockdown	adipogenic differentiation	Day 5	total RNA	paired-end	Illumina HiSeq 2500		raw_counts.txt	shNFIb_D5.txt	shNF1b_D5_1.fastq.gz	shNF1b_D5_2.fastq.gz
Sample 7	C3H10T1/2 cells, shMLL1, Day0	Mus musculus	C3H 10T1/2	mesenchymal stem cells	MLL1 knockdown	adipogenic differentiation	Day 0	total RNA	paired-end	Illumina HiSeq 2500		raw_counts.txt	shMLL1_D0.txt	shMLL1_D0_1.fastq.gz	shMLL1_D0_2.fastq.gz
Sample 8	C3H10T1/2 cells, shMLL1, Day5	Mus musculus	C3H 10T1/2	mesenchymal stem cells	MLL1 knockdown	adipogenic differentiation	Day 5	total RNA	paired-end	Illumina HiSeq 2500		raw_counts.txt	shMLL1_D5.txt	shMLL1_D5_1.fastq.gz	shMLL1_D5_2.fastq.gz
PROTOCOLS
# Information provided in this section will appear in each GEO Sample (GSM record).
growth protocol optional	C3H 10T1/2 mesenchymal cells were maintained in DMEM supplemented with 10% fetal bovine serum (FBS) and antibiotics in humidified atmosphere with 5% CO2 at 37C
treatment protocol optional	Adipogenic differentiation was induced by treatment of 2-day post confluent cells (designated day 0, D0) with 10ug/ml insulin (Sigma),
treatment protocol optional	1uM dexamethasone (Sigma), and 0.5mM isobutylmethylxanthine (Sigma) in the presence of 10% FBS until day 2. Cells were then fed with DMEM supplemented with 10% FBS and 10ug/ml insulin for 2 days, after which they were fed every other day with DMEM containing 10% FBS
*extract protocol	RNA was harvested using Rneasy mini plus kit (Qiagen). 1.3 ug of total RNA was used for the construction of sequencing libraries.
*library construction protocol	RNA libraries for RNA-seq were prepared using SMARTER mRNA-Seq Library Prep Kit following manufacturer's protocols.
*library strategy	RNA-seq
*data processing step	CLC Genomics Workbench v 11.0.1
*data processing step	Sequence reads were trimmed for adaptor sequence/low-quality sequence using CLC genomic benchwork (parameter- Quality limit: 0.05)
*data processing step	Trimmed sequence reads were mapped to GrCM38/mm10 using CLC genomic benchwork (parameters- mismath cost: 2 insertion cost: 3 deletion cost: 3 length fraction: 0.8 similarity fraction: 0.8)
*data processing step	Read count extraction and normalization were performed using CLC genomic benchwork
*data processing step
*genome build/assembly	mm10
*processed data files format and content	tab-delimited text file includes raw counts for each Sample
*processed data files format and content	tab-delimited text files include RPKM values for each Sample
PAIRED-END EXPERIMENTS
# If "paired-end" experiments are included, list the files for each paired-end run in a row. Each row will become one sequencing run on a GEO Sample (GSM record).
# Single-cell data: If applicable, list index files (I1, I2, etc.) in "file name 3", "file name 4" columns.
# Please make sure all raw files listed here are also listed in the "raw file" columns in the above SAMPLES section.
file name 1	file name 2
shControl_D0_1.fastq.gz	shControl_D0_2.fastq.gz
shControl_D5_1.fastq.gz	shControl_D5_2.fastq.gz
shKDM4D_D0_1.fastq.gz	shKDM4D_D0_2.fastq.gz
shKDM4D_D5_1.fastq.gz	shKDM4D_D5_2.fastq.gz
shNF1b_D0_1.fastq.gz	shNF1b_D0_2.fastq.gz
shNF1b_D5_1.fastq.gz	shNF1b_D5_2.fastq.gz
shMLL1_D0_1.fastq.gz	shMLL1_D0_2.fastq.gz
shMLL1_D5_1.fastq.gz	shMLL1_D5_2.fastq.gz

## Sheet: ChIP-seq EXAMPLE
# This EXAMPLE worksheet is for illustrative purposes only and is not editable. Please complete the “Metadata Template" for your submission.
STUDY
# This section describes the overall study.
# Information provided in this section will be displayed in a GEO Series (GSE record) on public web pages.
*title	Decoding the Protein Composition of Whole Nucleosomes with Nuc-MS
*summary (abstract)	Current proteomic approaches disassemble and digest nucleosome particles, blurring readouts of the ‘histone code’. To preserve nucleosome-level information, we developed Nuc-MS, which displays the landscape of histone variants and their post-translational modifications (PTMs) in a single mass spectrum. Combined with immunoprecipitation, Nuc-MS quantified nucleosome co-occupancy of histone H3.3 wi…
*experimental design	Chromatin immunoprecipitation DNA-sequencing (ChIP-seq) for histone variants H3.3, H2AZ as well as the histone modifications H3K79me2 and H4K16ac in HEK293T cells.
contributor	Luis,F,Schachner
contributor	Marta,Iwanaszko
contributor	Marc,A,Morgan
contributor	Ali,Shilatifard
contributor	Neil,Kelleher
supplementary file optional
SAMPLES
# Information provided in this section will be displayed in GEO Samples (GSM records) on public web pages.
# A GEO Sample record will be created from each row in this section.
# Biological replicates of the same sample: If provided, should be listed on different rows and titled accordingly (biol rep 1, biol rep 2, and so on).
# Technical replicates, eg, the same libraries were run in different lanes of a flow cell or sequenced multiple times: If provided, list all raw files in the same row, adding more "raw file" columns as needed to accommodate all raw files.
*library name	*title	*organism	**cell line	**cell type	ChIP antibody	*molecule	*single or paired-end	*instrument model	description	*processed data file	processed data file	*raw file	raw file	raw file	raw file
HEK293T_H2AZ_CST	HEK293T, H2AZ, ChIP	Homo sapiens	HEK293T	Human embryonic kidney	H2AZ (CST, #2718S)	Genomic DNA	single	Illumina NovaSeq 6000		MM379_HEK293T_H2AZ_CST.bw	MM379_HEK293T_XL_H2AZ_CST_peaks.narrowPeak	MM379_HEK293T_H2AZ_CST_S9_L001_R1_001.fastq.gz	MM379_HEK293T_H2AZ_CST_S9_L002_R1_001.fastq.gz
HEK293T_H3_3_EMDMillipore	HEK293T, H3.3, ChIP	Homo sapiens	HEK293T	Human embryonic kidney	H3.3 (EMD/Millipore, #09-838)	Genomic DNA	single	Illumina NovaSeq 6000		MM381_HEK293T_H3_3_EMDMillipore.bw	MM381_HEK293T_XL_H3_3_EMDMillipore_peaks.narrowPeak	MM381_HEK293T_H3_3_EMDMillipore_S11_L001_R1_001.fastq.gz	MM381_HEK293T_H3_3_EMDMillipore_S11_L002_R1_001.fastq.gz
HEK293T_H4K16ac_CST	HEK293T, H4K16ac, ChIP	Homo sapiens	HEK293T	Human embryonic kidney	H4K16ac (CST, #13534S)	Genomic DNA	single	Illumina NovaSeq 6000		MM383_HEK293T_H4K16ac_CST.bw	MM383_HEK293T_XL_H4K16ac_CST_peaks.narrowPeak	MM383_HEK293T_H4K16ac_CST_S13_L001_R1_001.fastq.gz	MM383_HEK293T_H4K16ac_CST_S13_L002_R1_001.fastq.gz
HEK293T_H3K79me2_CST	HEK293T, H3K79me2, ChIP	Homo sapiens	HEK293T	Human embryonic kidney	H3K79me2 (CST, #5427S)	Genomic DNA	single	Illumina NovaSeq 6000		MM384_HEK293T_H3K79me2_CST.bw	MM384_HEK293T_XL_H3K79me2_CST_peaks.narrowPeak	MM384_HEK293T_H3K79me2_CST_S14_L001_R1_001.fastq.gz	MM384_HEK293T_H3K79me2_CST_S14_L002_R1_001.fastq.gz
HEK293T_Input	HEK293T, Input	Homo sapiens	HEK293T	Human embryonic kidney	none	Genomic DNA	single	Illumina NovaSeq 6000		MM391_HEK293T_Input.bw		MM391_HEK293T_Input_S15_L001_R1_001.fastq.gz	MM391_HEK293T_Input_S15_L002_R1_001.fastq.gz
PROTOCOLS
# Information provided in this section will appear in each GEO Sample (GSM record).
growth protocol optional	DMEM, 15% fetal bovine serum, 2mM glutamine, 1x penicillin/streptomycin. Cells were cultured at 37C at 5% CO2.
treatment protocol optional
*extract protocol	Cells were fixed with 1% formaldehyde for 10 minutes. After quenching and cell lysis, chromatin was sonicated using a E220 focused-ultrasonicator (Covaris).
*library construction protocol	ChIP-seq libraries were prepared using the KAPA HTP Library Preparation Kit complemented with NEXTflex DNA Barcodes from Bioo Scientific. 10 ng of DNA was used as starting material for input and ip samples. Libraries were amplified using 13 cycles on the thermocycler. Post amplification libraries were size selected at 250-450bp in length using Agencourt AMPure XP beads from Beckman Coulter. Libra…
*library strategy	ChIP-Seq
*data processing step	Basecalls were performed using bcl2fastq v2.17 for Novaseq output.
*data processing step	ChIP-seq reads were trimmed from 3' end until the final base had a quality score > 30, using Trimmomatic v0.33, discarding reads left with < 20 bp
*data processing step	ChIP-seq reads were aligned to the UCSC hg38 genome using Bowtie version 1.1.2. Only uniquely mapping reads with at most two mismatches were retained.
*data processing step	To create ChIP-seq coverage plots, the locations of the mapped ChIP-seq reads were extended to 150 bp to represent sequenced fragments, renormalized (to reads per million, rpm) and reformatted in the bigWig file format.
*data processing step	Peaks were called uing MACS v2.1.0 with the significance cut-off q-value <=0.01
*data processing step	bigWig files were generated using the genomicRanges R package. Score represents the normalized coverage of DNA fragments at a given genomic coordinate. narrowPeak files were generated using MACS v2 with default settings.
*genome build/assembly	hg38
*processed data files format and content	bigWig, narrowPeak (except for Input sample)
PAIRED-END EXPERIMENTS
# If "paired-end" experiments are included, list the files for each paired-end run in a row. Each row will become one sequencing run on a GEO Sample (GSM record).
# Single-cell data: If applicable, list index files (I1, I2, etc.) in "file name 3", "file name 4" columns.
# Please make sure all raw files listed here are also listed in the "raw file" columns in the above SAMPLES section.
file name 1	file name 2

## Sheet: scRNA-seq EXAMPLE
# This EXAMPLE worksheet is for illustrative purposes only and is not editable. Please complete the “Metadata Template" for your submission.
STUDY
# This section describes the overall study.
# Information provided in this section will be displayed in a GEO Series (GSE record) on public web pages.
*title	Gene expression profile at single cell level of goblet cells (GCs) from the distal colon (DC) and the 8th portion of the small intestine (Si8)
*summary (abstract)	Goblet cells are considered as a homogeneous population in the intestinal epithelium. We used single cell RNA sequencing (scRNA-seq) to analyze the diversity of GCs in the intestine.
*experimental design	Intestinal GCs of the RedMUC298trTg mice were isolated by Fluorescence-activated cell sorting (FACS) according to the presence or absence of mCherry signal and analyzed using scRNAseq.
contributor	Beatriz, Martinez Abad
contributor	Malin, Johansson
supplementary file optional
SAMPLES
# Information provided in this section will be displayed in GEO Samples (GSM records) on public web pages.
# A GEO Sample record will be created from each row in this section.
# Biological replicates of the same sample: If provided, should be listed on different rows and titled accordingly (biol rep 1, biol rep 2, and so on).
# Technical replicates, eg, the same libraries were run in different lanes of a flow cell or sequenced multiple times: If provided, list all raw files in the same row, adding more "raw file" columns as needed to accommodate all raw files.
*library name	*title	*organism	**cell type	**tissue	strain	age	*molecule	*single or paired-end	*instrument model	description	*processed data file	processed data file	processed data file	*raw file	raw file	raw file	raw file	raw file	raw file	raw file	raw file	raw file	raw file	raw file	raw file
Sample 1	Si8, replicate 1, scRNAseq	Mus musculus	Goblet cells	8th section of the small intestine	RedMUC298trTg	6-8 weeks old	total RNA	paired-end	Illumina NextSeq 500	10x Genomics	R1_Si8_barcodes.tsv	R1_Si8_genes.tsv	R1_Si8_matrix.mtx	replicate_1_9oct2017_S1_L001_I1_001.fastq.gz	replicate_1_9oct2017_S1_L001_R1_001.fastq.gz	replicate_1_9oct2017_S1_L001_R2_001.fastq.gz	replicate_1_9oct2017_S1_L002_I1_001.fastq.gz	replicate_1_9oct2017_S1_L002_R1_001.fastq.gz	replicate_1_9oct2017_S1_L002_R2_001.fastq.gz	replicate_1_9oct2017_S1_L003_I1_001.fastq.gz	replicate_1_9oct2017_S1_L003_R1_001.fastq.gz	replicate_1_9oct2017_S1_L003_R2_001.fastq.gz	replicate_1_9oct2017_S1_L004_I1_001.fastq.gz	replicate_1_9oct2017_S1_L004_R1_001.fastq.gz	replicate_1_9oct2017_S1_L004_R2_001.fastq.gz
Sample 2	DC, replicate 1, scRNAseq	Mus musculus	Goblet cells	Distal colon	RedMUC298trTg	6-8 weeks old	total RNA	paired-end	Illumina NextSeq 500	10x Genomics	R1_DC_barcodes.tsv	R1_DC_genes.tsv	R1_DC_matrix.mtx	replicate_1_9oct2017_S2_L001_I1_001.fastq.gz	replicate_1_9oct2017_S2_L001_R1_001.fastq.gz	replicate_1_9oct2017_S2_L001_R2_001.fastq.gz	replicate_1_9oct2017_S2_L002_I1_001.fastq.gz	replicate_1_9oct2017_S2_L002_R1_001.fastq.gz	replicate_1_9oct2017_S2_L002_R2_001.fastq.gz	replicate_1_9oct2017_S2_L003_I1_001.fastq.gz	replicate_1_9oct2017_S2_L003_R1_001.fastq.gz	replicate_1_9oct2017_S2_L003_R2_001.fastq.gz	replicate_1_9oct2017_S2_L004_I1_001.fastq.gz	replicate_1_9oct2017_S2_L004_R1_001.fastq.gz	replicate_1_9oct2017_S2_L004_R2_001.fastq.gz
Sample 3	Si8, replicate 2, scRNAseq	Mus musculus	Goblet cells	8th section of the small intestine	RedMUC298trTg	6-8 weeks old	total RNA	paired-end	Illumina NextSeq 500	10x Genomics	R2_Si8_barcodes.tsv	R2_Si8_genes.tsv	R2_Si8_matrix.mtx	replicate_2_1nov17_S1_L001_I1_001.fastq.gz	replicate_2_1nov17_S1_L001_R1_001.fastq.gz	replicate_2_1nov17_S1_L001_R2_001.fastq.gz	replicate_2_1nov17_S1_L002_I1_001.fastq.gz	replicate_2_1nov17_S1_L002_R1_001.fastq.gz	replicate_2_1nov17_S1_L002_R2_001.fastq.gz	replicate_2_1nov17_S1_L003_I1_001.fastq.gz	replicate_2_1nov17_S1_L003_R1_001.fastq.gz	replicate_2_1nov17_S1_L003_R2_001.fastq.gz	replicate_2_1nov17_S1_L004_I1_001.fastq.gz	replicate_2_1nov17_S1_L004_R1_001.fastq.gz	replicate_2_1nov17_S1_L004_R2_001.fastq.gz
Sample 4	DC, replicate 2, scRNAseq	Mus musculus	Goblet cells	Distal colon	RedMUC298trTg	6-8 weeks old	total RNA	paired-end	Illumina NextSeq 500	10x Genomics	R2_DC_barcodes.tsv	R2_DC_genes.tsv	R2_DC_matrix.mtx	replicate_2_1nov17_S2_L001_I1_001.fastq.gz	replicate_2_1nov17_S2_L001_R1_001.fastq.gz	replicate_2_1nov17_S2_L001_R2_001.fastq.gz	replicate_2_1nov17_S2_L002_I1_001.fastq.gz	replicate_2_1nov17_S2_L002_R1_001.fastq.gz	replicate_2_1nov17_S2_L002_R2_001.fastq.gz	replicate_2_1nov17_S2_L003_I1_001.fastq.gz	replicate_2_1nov17_S2_L003_R1_001.fastq.gz	replicate_2_1nov17_S2_L003_R2_001.fastq.gz	replicate_2_1nov17_S2_L004_I1_001.fastq.gz	replicate_2_1nov17_S2_L004_R1_001.fastq.gz	replicate_2_1nov17_S2_L004_R2_001.fastq.gz
PROTOCOLS
# Information provided in this section will appear in each GEO Sample (GSM record).
growth protocol optional
treatment protocol optional
treatment protocol optional
*extract protocol	Freshly collected DC and Si8 from RedMUC298trTg mice were flushed with ice-cold HBSSwo (Mg2+/Ca2+ free supplemented with 10mM HEPES, pH 7.2) to remove luminal content. The tissue was inverted and inflated by injection of HBSSwo. Epithelial isolation was performed by incubation of tissue with pre-digestion buffer (HBSSwo, 5 mM EDTA, 5% v/v FCS, 1 mM DTT) in a shaking incubator. The isolated epithe…
*library construction protocol	Library was performed according to the manufacter’s instructions (single cell 3’ v2 protocol, 10x Genomics). Briefly, GCs were resuspended in the master mix and loaded together with partitioning oil and gel beads into the chip to generate the gel bead-in-emulsion (GEM). The poly-A RNA from the cell lysate contained in every single GEM was retrotranscripted to cDNA, which contains an Ilumina R1 pr…
*library strategy	scRNA-seq
*data processing step	The demultiplexing, barcoded processing, gene counting and aggregation were made using the Cell Ranger software v2.1.1 (https://support.10xgenomics.com/single-cell-gene-expression/software/pipelines/latest/what-is-cell-ranger)
*data processing step
*data processing step
*data processing step
*data processing step
*genome build/assembly	mm10
*processed data files format and content	Tab-separated values files and matrix files
PAIRED-END EXPERIMENTS
# If "paired-end" experiments are included, list the files for each paired-end run in a row. Each row will become one sequencing run on a GEO Sample (GSM record).
# Single-cell data: If applicable, list index files (I1, I2, etc.) in "file name 3", "file name 4" columns.
# Please make sure all raw files listed here are also listed in the "raw file" columns in the above SAMPLES section.
file name 1	file name 2	file name 3
replicate_1_9oct2017_S1_L001_I1_001.fastq.gz	replicate_1_9oct2017_S1_L001_R1_001.fastq.gz	replicate_1_9oct2017_S1_L001_R2_001.fastq.gz
replicate_1_9oct2017_S1_L002_I1_001.fastq.gz	replicate_1_9oct2017_S1_L002_R1_001.fastq.gz	replicate_1_9oct2017_S1_L002_R2_001.fastq.gz
replicate_1_9oct2017_S1_L003_I1_001.fastq.gz	replicate_1_9oct2017_S1_L003_R1_001.fastq.gz	replicate_1_9oct2017_S1_L003_R2_001.fastq.gz
replicate_1_9oct2017_S1_L004_I1_001.fastq.gz	replicate_1_9oct2017_S1_L004_R1_001.fastq.gz	replicate_1_9oct2017_S1_L004_R2_001.fastq.gz
replicate_1_9oct2017_S2_L001_I1_001.fastq.gz	replicate_1_9oct2017_S2_L001_R1_001.fastq.gz	replicate_1_9oct2017_S2_L001_R2_001.fastq.gz
replicate_1_9oct2017_S2_L002_I1_001.fastq.gz	replicate_1_9oct2017_S2_L002_R1_001.fastq.gz	replicate_1_9oct2017_S2_L002_R2_001.fastq.gz
replicate_1_9oct2017_S2_L003_I1_001.fastq.gz	replicate_1_9oct2017_S2_L003_R1_001.fastq.gz	replicate_1_9oct2017_S2_L003_R2_001.fastq.gz
replicate_1_9oct2017_S2_L004_I1_001.fastq.gz	replicate_1_9oct2017_S2_L004_R1_001.fastq.gz	replicate_1_9oct2017_S2_L004_R2_001.fastq.gz
replicate_2_1nov17_S1_L001_I1_001.fastq.gz	replicate_2_1nov17_S1_L001_R1_001.fastq.gz	replicate_2_1nov17_S1_L001_R2_001.fastq.gz
replicate_2_1nov17_S1_L002_I1_001.fastq.gz	replicate_2_1nov17_S1_L002_R1_001.fastq.gz	replicate_2_1nov17_S1_L002_R2_001.fastq.gz
replicate_2_1nov17_S1_L003_I1_001.fastq.gz	replicate_2_1nov17_S1_L003_R1_001.fastq.gz	replicate_2_1nov17_S1_L003_R2_001.fastq.gz
replicate_2_1nov17_S1_L004_I1_001.fastq.gz	replicate_2_1nov17_S1_L004_R1_001.fastq.gz	replicate_2_1nov17_S1_L004_R2_001.fastq.gz
replicate_2_1nov17_S2_L001_I1_001.fastq.gz	replicate_2_1nov17_S2_L001_R1_001.fastq.gz	replicate_2_1nov17_S2_L001_R2_001.fastq.gz
replicate_2_1nov17_S2_L002_I1_001.fastq.gz	replicate_2_1nov17_S2_L002_R1_001.fastq.gz	replicate_2_1nov17_S2_L002_R2_001.fastq.gz
replicate_2_1nov17_S2_L003_I1_001.fastq.gz	replicate_2_1nov17_S2_L003_R1_001.fastq.gz	replicate_2_1nov17_S2_L003_R2_001.fastq.gz
replicate_2_1nov17_S2_L004_I1_001.fastq.gz	replicate_2_1nov17_S2_L004_R1_001.fastq.gz	replicate_2_1nov17_S2_L004_R2_001.fastq.gz

## Sheet: CITE-seq EXAMPLE
# This EXAMPLE worksheet is for illustrative purposes only and is not editable. Please complete the “Metadata Template" for your submission.
STUDY
# This section describes the overall study.
# Information provided in this section will be displayed in a GEO Series (GSE record) on public web pages.
*title	Transcriptional profiling of Cd169-lineage lymph node macrophages
*summary (abstract)	Tingible body macrophages (TBMs) exist in lymph node B cell follicles and are responsible for clearing apoptotic B cells. Our data suggests that TBMs are of Cd169-lineage. We isolated cells from Cd169Cre/+.Tdtomatofl/fl reporter mice and transcriptionally profiled them to identify putative TBMs and chacterize their development and function relative to other LN cells of the Cd169 lineage.
*experimental design	Cd169Cre/+.Tdtomatofl/fl mice were immunized with hen egg lysozyme (HEL). Lymph nodes were harvested from 4 mice (2 unimmunized and 2 immunized mice), 9 days later. The cells were stained with CITE-seq antibodies (ADTs and HTOs), and Tomato pos CD11b hi cells were isolated by Fluorescence-activated cell sorting (FACS).
contributor	Tri, G, Phan
contributor	Akira, Nguyen
contributor	Abigail, K, Grootveld
supplementary file optional	feature_reference.csv
supplementary file optional
Please provide details for the ADT and/or HTO antibodies ===>	ADT/HTO	barcode sequence	hashtagged sample
Details will be linked as a supplementary file to the GSE record.	TotalSeq-A0106 anti-mouse CD11c	GTTATGGACGCTTGC
feature_reference.csv file is required for GDO experiments	TotalSeq-A0015 anti-mouse Ly-6G	ACATTGACGCAACTA
	TotalSeq-A0013 anti-mouse Ly-6C	AAGTCGTGAGGCATG
	TotalSeq-A0440 anti-mouse CD169 (Siglec-1)	ATTGACGACAGTCAT
	TotalSeq-A0560 anti-mouse CD68	CTTTCTTTCACGGGA
	TotalSeq-A0114 anti-mouse F4/80	TTAACTTCAGCCCGT
	TotalSeq-A0301 anti-mouse Hashtag 1	ACCCACCAGTAAGAC	unimmunized mouse 1
	TotalSeq-A0302 anti-mouse Hashtag 2	GGTCGAGAGCATTCA	unimmunized mouse 2
	TotalSeq-A0303 anti-mouse Hashtag 3	CTTGCCGCATGTCAT	immunized mouse 1
	TotalSeq-A0304 anti-mouse Hashtag 4	AAAGCATTCTTCACG	immunized mouse 2
SAMPLES
# Information provided in this section will be displayed in GEO Samples (GSM records) on public web pages.
# A GEO Sample record will be created from each row in this section.
# Biological replicates of the same sample: If provided, should be listed on different rows and titled accordingly (biol rep 1, biol rep 2, and so on).
# Technical replicates, eg, the same libraries were run in different lanes of a flow cell or sequenced multiple times: If provided, list all raw files in the same row, adding more "raw file" columns as needed to accommodate all raw files.
*library name	*title	*organism	**tissue	**cell type	treatment	library type	ADT	HTO	*molecule	*single or paired-end	*instrument model	description	description	description	*processed data file	processed data file	processed data file	*raw file	raw file	raw file	raw file	raw file	raw file	raw file	raw file
TBM_1_mRNA	CD11b hi TOM+ cells, GEX	Mus musculus	lymph nodes	CD11b hi TOM +	mixed sample (unimmunized, immunized)	mRNA			polyA RNA	paired-end	Illumina Novaseq 6000		polyA RNA	GEX (3' mRNA) library: read1 file contains cell barcode and UMI; read2 file contains transcript	mRNA_barcodes.tsv.gz	mRNA_features.tsv.gz	mRNA_matrix.mtx.gz	TBM_1_S1_L001_R1_001.fastq.gz	TBM_1_S1_L001_R2_001.fastq.gz	TBM_1_S1_L001_I1_001.fastq.gz	TBM_1_S1_L002_R1_001.fastq.gz	TBM_1_S1_L002_R2_001.fastq.gz	TBM_1_S1_L002_I1_001.fastq.gz
TBM_1_adt	CD11b hi TOM+ cells, ADT	Mus musculus	lymph nodes	CD11b hi TOM +	mixed sample (unimmunized, immunized)	ADT	TotalSeq-A0106 anti-mouse CD11c, TotalSeq-A0015 anti-mouse Ly-6G, TotalSeq-A0013 anti-mouse Ly-6C, TotalSeq-A0440 anti-mouse CD169 (Siglec-1), TotalSeq-A0560 anti-mouse CD68, TotalSeq-A0114 anti-mouse F4/80		protein	paired-end	Illumina Novaseq 6000		Antibody-derived oligonucleotide (ADT)	ADT: read1 file contains cell barcode and UMI; read2 file contains Antibody Derived Tag reads	adt_barcodes.tsv.gz	adt_features.tsv.gz	adt_matrix.mtx.gz	TBM_1_adt_S1_L001_R1_001.fastq.gz	TBM_1_adt_S1_L001_R2_001.fastq.gz		TBM_1_adt_S1_L002_R1_001.fastq.gz	TBM_1_adt_S1_L002_R2_001.fastq.gz
TBM_1_hto	CD11b hi TOM+ cells, HTO	Mus musculus	lymph nodes	CD11b hi TOM +	mixed sample (unimmunized, immunized)	HTO		TotalSeq-A0301 anti-mouse Hashtag 1, TotalSeq-A0302 anti-mouse Hashtag 2, TotalSeq-A0303 anti-mouse Hashtag 3, TotalSeq-A0304 anti-mouse Hashtag 4	protein	paired-end	Illumina Novaseq 6000		Hashtag-derived oligonucleotide (HTO)	HTO library: read1 file contains cell barcode and UMI; read2 file contains Hashtag Antibody Derived Tag reads	hto_barcodes.tsv.gz	hto_features.tsv.gz	hto_matrix.mtx.gz	TBM_1_hto_S2_L001_R1_001.fastq.gz	TBM_1_hto_S2_L001_R2_001.fastq.gz		TBM_1_hto_S2_L002_R1_001.fastq.gz	TBM_1_hto_S2_L002_R2_001.fastq.gz
TBM_1_gdo	CD11b hi TOM+ cells, GDO	Mus musculus	lymph nodes	CD11b hi TOM +	mixed sample (unimmunized, immunized)	GDO			other	paired-end	Illumina Novaseq 6000		Guide-derived oligonucleotide (GDO)	GDO library: read1 file contains cell barcode and UMI; read2 file contains Guide Derived Tag reads	gdo_barcodes.tsv	gdo_features.tsv.gz	gdo_matrix.mtx.gz	TBM_1_gdo_S2_L001_R1_001.fastq.gz	TBM_1_gdo_S2_L001_R2_001.fastq.gz
PROTOCOLS
# Information provided in this section will appear in each GEO Sample (GSM record).
growth protocol optional
treatment protocol optional
*extract protocol	CD11b hi TOM pos cells sorted from 2 unimmunized 2 immunized mice. Single cells were encapsulated in Gel-Beads-in emulsion (GEMs) using the 10X Controller with a Chromium Single Cell 3’ GEM Library and Gel Bead kit (Garvan Weizmann Centre for Cellular Genomics).
*library construction protocol	The CITE-seq and hashing protocol described by Stoeckius et al was used to generate an antibody-derived tag (ADT) sequencing library, a hashtag oligo (HTO) library and a 3’ gene expression library (Stoeckius et al.,2017) https://citeseq.files.wordpress.com/2019/02/cite-seq_and_hashing_protocol_190213.pdf
*library strategy	OTHER: CITE-seq
*data processing step	CellRanger v4.0.0. count and aggr functions to aggregate reads across sequencing lanes into a single set of barcodes.tsv.gz, features.tsv.gz and matrix.mtx.gz
*data processing step	Cell barcodes from CellRanger output were used as whitelist to quantify ADTs and HTOs using CITE-seq-Count (v1.4.5)
*data processing step
*data processing step
*data processing step
*genome build/assembly	mm10
*processed data files format and content	CellRanger output files: mRNA_barcodes.tsv.gz, mRNA_features.tsv.gz, mRNA_matrix.mtx.gz
*processed data files format and content	CellRanger output files: adt_barcodes.tsv.gz, adt_features.tsv.gz, adt_matrix.tsv.gz
*processed data files format and content	CellRanger output files: hto_barcodes.tsv.gz, hto_features.tsv.gz, hto_matrix.tsv.gz
*processed data files format and content	CellRanger output files: gdo_barcodes.tsv.gz, gdo_features.tsv.gz, gdo_matrix.tsv.gz, feature_reference.csv
PAIRED-END EXPERIMENTS
# If "paired-end" experiments are included, list the files for each paired-end run in a row. Each row will become one sequencing run on a GEO Sample (GSM record).
# Single-cell data: If applicable, list index files (I1, I2, etc.) in "file name 3", "file name 4" columns.
# Please make sure all raw files listed here are also listed in the "raw file" columns in the above SAMPLES section.
file name 1	file name 2	file name 3
TBM_1_S1_L001_R1_001.fastq.gz	TBM_1_S1_L001_R2_001.fastq.gz	TBM_1_S1_L001_I1_001.fastq.gz
TBM_1_S1_L002_R1_001.fastq.gz	TBM_1_S1_L002_R2_001.fastq.gz	TBM_1_S1_L002_I1_001.fastq.gz
TBM_1_adt_S1_L001_R1_001.fastq.gz	TBM_1_adt_S1_L001_R2_001.fastq.gz
TBM_1_adt_S1_L002_R1_001.fastq.gz	TBM_1_adt_S1_L002_R2_001.fastq.gz
TBM_1_hto_S2_L001_R1_001.fastq.gz	TBM_1_hto_S2_L001_R2_001.fastq.gz
TBM_1_hto_S2_L002_R1_001.fastq.gz	TBM_1_hto_S2_L002_R2_001.fastq.gz
TBM_1_gdo_S2_L001_R1_001.fastq.gz	TBM_1_gdo_S2_L001_R2_001.fastq.gz

## Sheet: Spatial Transcriptomics EXAMPLE
# This EXAMPLE worksheet is for illustrative purposes only and is not editable. Please complete the “Metadata Template" for your submission.
STUDY
# This section describes the overall study.
# Information provided in this section will be displayed in a GEO Series (GSE record) on public web pages.
*title	Spatial transcriptomics reveals functional compartmentalization of estrogen receptor positive (ER+) breast cancer
*summary (abstract)	Intratumor heterogeneity is one of the hallmarks of cancers, including breast cancers. We performed spatial transcriptomics to profile heterogeneous cell populations within ER+ breast cancers as well as to determine their importance for estrogen-dependent tumor growth. Our analysis has revealed the key functional compartments for developing targeted therapeutic strategies against ER+ breast cance…
*experimental design	Two ER+ breast cancer patient-derived xenografts (PDXs) with opposite estrogen responses for tumor growths were used for the analysis: estrogen-suppressed GS3 and estrogen-dependent SC31 models. GS3 and SC31 tumors treated with placebo or 17β-estradiol (E2) were analyzed using spatial transcriptomics.
contributor	Shiuan, Chen
contributor	Ryohei, Yoshitake
contributor	Hitomi, Mori
supplementary file optional
SAMPLES
# Information provided in this section will be displayed in GEO Samples (GSM records) on public web pages.
# A GEO Sample record will be created from each row in this section.
# Biological replicates of the same sample: If provided, should be listed on different rows and titled accordingly (biol rep 1, biol rep 2, and so on).
# Technical replicates, eg, the same libraries were run in different lanes of a flow cell or sequenced multiple times: If provided, list all raw files in the same row, adding more "raw file" columns as needed to accommodate all raw files.
*library name	*title	*organism	**tissue	model	treatment	*molecule	*single or paired-end	*instrument model	description	*processed data file	processed data file	processed data file	processed data file	processed data file	processed data file	processed data file	processed data file	processed data file	*raw file	raw file	raw file	raw file	raw file	raw file
39738_1-A1-well-GS3_Placebo_No-924	GS3 PDX, Placebo	Homo sapiens	GS3 breast cancer PDX	estrogen-suppressed GS3 model	Placebo	total RNA	paired-end	Illumina HiSeq 2500	Fresh frozen Spatial transcriptome sequencing	GS3-Placebo_aligned_fiducials.jpg	GS3-Placebo_detected_tissue_image.jpg	GS3-Placebo_scalefactors_json.json	GS3-Placebo_tissue_hires_image.png	GS3-Placebo_tissue_lowres_image.png	GS3-Placebo_tissue_positions_list.csv	39738_barcodes.tsv.gz	39738_features.tsv.gz	39738_matrix.mtx.gz	COHP_39738_1_K22028_CACCGCAC_S1_L003_R1_001.fastq.gz	COHP_39738_1_K22028_CACCGCAC_S1_L003_R2_001.fastq.gz	COHP_39738_1_K22028_CACCGCAC_S1_L003_I1_001.fastq.gz	COHP_39738_1_K22028_CACCGCAC_S1_L004_R1_001.fastq.gz	COHP_39738_1_K22028_CACCGCAC_S1_L004_R2_001.fastq.gz	COHP_39738_1_K22028_CACCGCAC_S1_L004_I1_001.fastq.gz
39739_2-B1-well-GS3_E2_No-922	GS3 PDX, E2	Homo sapiens	GS3 breast cancer PDX	estrogen-suppressed GS3 model	E2	total RNA	paired-end	Illumina HiSeq 2500	Fresh frozen Spatial transcriptome sequencing	GS3-E2_aligned_fiducials.jpg	GS3-E2_detected_tissue_image.jpg	GS3-E2_scalefactors_json.json	GS3-E2_tissue_hires_image.png	GS3-E2_tissue_lowres_image.png	GS3-E2_tissue_positions_list.csv	39739_barcodes.tsv.gz	39739_features.tsv.gz	39739_matrix.mtx.gz	COHP_39739_1_K22029_CGTCAAGG_S1_L003_R1_001.fastq.gz	COHP_39739_1_K22029_CGTCAAGG_S1_L003_R2_001.fastq.gz	COHP_39739_1_K22029_CGTCAAGG_S1_L003_I1_001.fastq.gz	COHP_39739_1_K22029_CGTCAAGG_S1_L004_R1_001.fastq.gz	COHP_39739_1_K22029_CGTCAAGG_S1_L004_R2_001.fastq.gz	COHP_39739_1_K22029_CGTCAAGG_S1_L004_I1_001.fastq.gz
39740_3-C1-well-SC-31_Placebo_No-819	SC31 PDX, Placebo	Homo sapiens	SC31 breast cancer PDX	estrogen-dependent SC31 model	Placebo	total RNA	paired-end	Illumina HiSeq 2500	Fresh frozen Spatial transcriptome sequencing	SC31-Placebo_aligned_fiducials.jpg	SC31-Placebo_detected_tissue_image.jpg	SC31-Placebo_scalefactors_json.json	SC31-Placebo_tissue_hires_image.png	SC31-Placebo_tissue_lowres_image.png	SC31-Placebo_tissue_positions_list.csv	39740_barcodes.tsv.gz	39740_features.tsv.gz	39740_matrix.mtx.gz	COHP_39740_1_K22030_TCGTCAAG_S1_L003_R1_001.fastq.gz	COHP_39740_1_K22030_TCGTCAAG_S1_L003_R2_001.fastq.gz	COHP_39740_1_K22030_TCGTCAAG_S1_L003_I1_001.fastq.gz	COHP_39740_1_K22030_TCGTCAAG_S1_L004_R1_001.fastq.gz	COHP_39740_1_K22030_TCGTCAAG_S1_L004_R2_001.fastq.gz	COHP_39740_1_K22030_TCGTCAAG_S1_L004_I1_001.fastq.gz
39741_4-D1-well-SC-31_E2_No-63	SC31 PDX, E2	Homo sapiens	SC31 breast cancer PDX	estrogen-dependent SC31 model	E2	total RNA	paired-end	Illumina HiSeq 2500	Fresh frozen Spatial transcriptome sequencing	SC31-E2_aligned_fiducials.jpg	SC31-E2_detected_tissue_image.jpg	SC31-E2_scalefactors_json.json	SC31-E2_tissue_hires_image.png	SC31-E2_tissue_lowres_image.png	SC31-E2_tissue_positions_list.csv	39741_barcodes.tsv.gz	39741_features.tsv.gz	39741_matrix.mtx.gz	COHP_39741_1_K22031_GAATTGGT_S1_L003_R1_001.fastq.gz	COHP_39741_1_K22031_GAATTGGT_S1_L003_R2_001.fastq.gz	COHP_39741_1_K22031_GAATTGGT_S1_L003_I1_001.fastq.gz	COHP_39741_1_K22031_GAATTGGT_S1_L004_R1_001.fastq.gz	COHP_39741_1_K22031_GAATTGGT_S1_L004_R2_001.fastq.gz	COHP_39741_1_K22031_GAATTGGT_S1_L004_I1_001.fastq.gz
PROTOCOLS
# Information provided in this section will appear in each GEO Sample (GSM record).
growth protocol optional	GS3 and SC31 tumor pieces were implanted into the 4th mammary fat pads of 9-11-week-old NOD-SCID/IL2Rγ−/− mice.
treatment protocol optional	Once the implanted tumors were established, placebo or E2 (1 mg) pellet were implanted subcutaneously. To ensure that there was enough tumor mass remaining for the analysis, GS3 tumors were implanted in intact mice and treated with E2 only for 1 week, or with placebo for 2 weeks, while SC31 tumors were implanted in ovariectomized mice and were treated for 6 weeks. After the treatment periods, tum…
*extract protocol	Fresh frozen tissue were OCT embedded, and 10µm frozen sections were cut with cryostat
*library construction protocol	Spatial transcriptome sequencing libraries were prepared with 10xGenomics Visium Spatail Gene Expression Slides & Reagent kit according to manufacturer's construction
*library strategy	OTHER: Spatial Transcriptomics
*data processing step	Raw sequencing data were processed using the 10x Genomics Space Ranger pipeline to generate FASTQ files
*data processing step	Sequences were aligned to mm10 genome to gene expression count using Space Ranger's default settings
*data processing step	Gene expression level of Refseq coding genes were quantified using Space Ranger's default settings
*data processing step
*data processing step
*genome build/assembly	mm10
*processed data files format and content	barcodes.tsv.gz: list of spatial barcodes
*processed data files format and content	features.tsv.gz: list of gene IDs
*processed data files format and content	matrix.mtx.gz: gene expresion count data in Matrix Market Exchange Format
*processed data files format and content	aligned_fiducials.jpg.gz: aligned fiducials of the tissue image
*processed data files format and content	detected_tissue_image.jpg.gz: image of tissue and spots
*processed data files format and content	scalefactors_json.json.gz: scalefactors in json format
*processed data files format and content	tissue_hires_image.png.gz: hi-res image of tissue
*processed data files format and content	tissue_lowres_image.png.gz: low-res image of tissue
*processed data files format and content	tissue_positions_list.csv.gz: list of spatial barcodes and the coordinates specifying spots
PAIRED-END EXPERIMENTS
# If "paired-end" experiments are included, list the files for each paired-end run in a row. Each row will become one sequencing run on a GEO Sample (GSM record).
# Single-cell data: If applicable, list index files (I1, I2, etc.) in "file name 3", "file name 4" columns.
# Please make sure all raw files listed here are also listed in the "raw file" columns in the above SAMPLES section.
file name 1	file name 2	file name 3
COHP_39738_1_K22028_CACCGCAC_S1_L003_R1_001.fastq.gz	COHP_39738_1_K22028_CACCGCAC_S1_L003_R2_001.fastq.gz	COHP_39738_1_K22028_CACCGCAC_S1_L003_I1_001.fastq.gz
COHP_39738_1_K22028_CACCGCAC_S1_L004_R1_001.fastq.gz	COHP_39738_1_K22028_CACCGCAC_S1_L004_R2_001.fastq.gz	COHP_39738_1_K22028_CACCGCAC_S1_L004_I1_001.fastq.gz
COHP_39739_1_K22029_CGTCAAGG_S1_L003_R1_001.fastq.gz	COHP_39739_1_K22029_CGTCAAGG_S1_L003_R2_001.fastq.gz	COHP_39739_1_K22029_CGTCAAGG_S1_L003_I1_001.fastq.gz
COHP_39739_1_K22029_CGTCAAGG_S1_L004_R1_001.fastq.gz	COHP_39739_1_K22029_CGTCAAGG_S1_L004_R2_001.fastq.gz	COHP_39739_1_K22029_CGTCAAGG_S1_L004_I1_001.fastq.gz
COHP_39740_1_K22030_TCGTCAAG_S1_L003_R1_001.fastq.gz	COHP_39740_1_K22030_TCGTCAAG_S1_L003_R2_001.fastq.gz	COHP_39740_1_K22030_TCGTCAAG_S1_L003_I1_001.fastq.gz
COHP_39740_1_K22030_TCGTCAAG_S1_L004_R1_001.fastq.gz	COHP_39740_1_K22030_TCGTCAAG_S1_L004_R2_001.fastq.gz	COHP_39740_1_K22030_TCGTCAAG_S1_L004_I1_001.fastq.gz
COHP_39741_1_K22031_GAATTGGT_S1_L003_R1_001.fastq.gz	COHP_39741_1_K22031_GAATTGGT_S1_L003_R2_001.fastq.gz	COHP_39741_1_K22031_GAATTGGT_S1_L003_I1_001.fastq.gz
COHP_39741_1_K22031_GAATTGGT_S1_L004_R1_001.fastq.gz	COHP_39741_1_K22031_GAATTGGT_S1_L004_R2_001.fastq.gz	COHP_39741_1_K22031_GAATTGGT_S1_L004_I1_001.fastq.gz

## Sheet: Data validation
Instrument model	library strategy
Illumina NovaSeq 6000	RNA-Seq
Illumina HiSeq 4000	scRNA-seq
Illumina NextSeq 500	CITE-seq
NextSeq 550	miRNA-Seq
BGISEQ-500	ncRNA-Seq
NextSeq 2000	ssRNA-seq
HiSeq X Ten	RNA-Seq (CAGE)
Illumina Genome Analyzer	RNA-Seq (RACE)
Illumina Genome Analyzer II	Spatial Transcriptomics
Illumina Genome Analyzer IIx	ChIP-Seq
Illumina HiSeq 1000	CUT&Tag
Illumina HiSeq 1500	MNase-Seq
Illumina HiSeq 2000	MBD-Seq
Illumina HiSeq 2500	MRE-Seq
Illumina HiSeq 3000	Bisulfite-Seq
Illumina MiSeq	Bisulfite-Seq (reduced representation)
Illumina HiScanSQ	MeDIP-Seq
Illumina MiniSeq	DNase-Hypersensitivity
Illumina iSeq 100	Tn-Seq
NextSeq 1000	FAIRE-seq
HiSeq X Five	SELEX
AB SOLiD System	RIP-Seq
AB SOLiD System 2.0	ATAC-seq
AB SOLiD System 3.0	ChIA-PET
AB SOLiD 3 Plus System	Hi-C
AB SOLiD 4 System	OTHER
AB SOLiD 4hq System
AB SOLiD PI System
AB 5500 Genetic Analyzer
AB 5500xl Genetic Analyzer
AB 5500xl-W Genetic Analysis System
454 GS
454 GS 20
454 GS FLX
454 GS FLX+
454 GS Junior
454 GS FLX Titanium
PacBio RS
PacBio RS II
Sequel
Sequel II
Ion Torrent PGM
Ion Torrent Proton
Ion Torrent S5
Ion Torrent S5 XL
Ion GeneStudio S5
Ion GeneStudio S5 plus
Ion GeneStudio S5 prime
Complete Genomics
Helicos HeliScope
GridION
MinION
PromethION
DNBSEQ-G400
DNBSEQ-T7
DNBSEQ-G50
MGISEQ-2000RS
